# RFRSN: Improving protein fold recognition by siamese network

Ke Han, Yan Liu, and Dong-Jun Yu\*

<sup>1</sup>School of Computer Science and Engineering, Nanjing University of Science and Technology, 200 Xiaolingwei, Nanjing, 210094, China;

\* To whom correspondence should be addressed.

Dong-Jun Yu, School of Computer Science and Engineering, Nanjing University of Science and Technology, China. Email: [njyudj@njust.edu.cn](mailto:njyudj@njust.edu.cn).

**Keywords:** protein fold recognition; bioinformatics; convolutional neural network

## Author Biography:

**Ke Han** received her M.S. degree in computer science from Nanjing University of Science and Technology in 2009. She is currently a PhD candidate in the School of Computer Science and Engineering at Nanjing University of Science and Technology and a member of Pattern Recognition and Bioinformatics Group. Her research interests include pattern recognition, machine learning and bioinformatics.

**Yan Liu** received his M.S. degree in computer science from Yangzhou University in 2019. He is currently a PhD candidate in the School of Computer Science and Engineering at Nanjing University of Science and Technology and a member of Pattern Recognition and Bioinformatics Group. His research interests include pattern recognition, machine learning and bioinformatics.

**Dong-Jun Yu** received the PhD degree from Nanjing University of Science and Technology in 2003. He is currently a full professor in the School of Computer Science and Engineering, Nanjing University of Science and Technology. His research interests include pattern recognition, machine learning and bioinformatics. He is a senior member of the China Computer Federation (CCF) and a senior member of the China Association of Artificial Intelligence (CAAI).

29 **ABSTRACT**

30 Protein fold recognition is the key to study protein structure and function. As a representative  
31 pattern recognition task, there are two main categories of approaches to improve the protein fold  
32 recognition performance: 1) extracting more discriminative descriptors, and 2) designing more  
33 effective distance metrics. The existing protein fold recognition approaches focus on the first  
34 category to finding a robust and discriminative descriptor to represent each protein sequence as a  
35 compact feature vector, where different protein sequence is expected to be separated as much as  
36 possible in the fold space. These methods have brought huge improvements to the task of protein  
37 fold recognition. However, so far, little attention has been paid to the second category. In this paper,  
38 we focus not only on the first category, but also on the second point that how to measure the  
39 similarity between two proteins more effectively. First, we employ deep convolutional neural  
40 network techniques to extract the discriminative fold-specific features from the potential protein  
41 residue-residue relationship, we name it SSAfold. On the other hand, due to different feature  
42 representation usually subject to varying distributions, the measurement of similarity needs to vary  
43 according to different feature distributions. Before, almost all protein fold recognition methods  
44 perform the same metrics strategy on all the protein feature ignoring the differences in feature  
45 distribution. This paper presents a new protein fold recognition by employing siamese network, we  
46 named it PFRSN. The objective of PFRSN is to learn a set of hierarchical nonlinear  
47 transformations to project protein pairs into the same fold feature subspace to ensure the distance  
48 between positive protein pairs is reduced and that of negative protein pairs is enlarged as much as  
49 possible. The experimental results show that the results of SSAfold and PFRSN are highly  
50 competitive.

## 51 INTRODUCTION

52 As the genome project continues to evolve, we are faced with exponentially growing sequences of  
53 proteins without knowing their structural or biochemical functions. Exploring the structure and  
54 function of even a single protein remains a non-trivial task, the best way to understand all these  
55 sequences is to search a database and link them to other proteins with known correct structures,  
56 which is also the goal of protein fold recognition. Improving these methods of protein fold  
57 recognition is one of the fundamental challenges in bioinformatics today. In general, these methods  
58 of protein fold recognition can be divided into machine learning methods and alignment methods.

59 Machine learning methods first extract fold-specific features and then directly classify proteins  
60 into different fold categories by employing different classifiers. In the early work, support vector  
61 machine and neural network [1] have been employed to construct a single classifier to identify fold  
62 type. Shen et al. [2] used ensemble classifiers to improve protein fold pattern recognition. Liu et al.  
63 [3] proposed SOFM to extract the sequence-order information of neighboring residues from  
64 multiple sequence alignment (MSA). Later, the RF-fold [4] and DN-fold [5] have been proposed by  
65 combining the deep neural network (DNN), random forest (RF) [6] and various features describing  
66 the pairwise similarities of two different protein sequence.

67 In contrast to machine learning methods, the mechanism of the alignment methods is that fold  
68 types are identified based on the similarity between the query protein and template at  
69 sequence-sequence [7-10] or sequence-structure level [11, 12]. The sequence of a query protein is  
70 aligned against the sequences of template proteins whose folds are known to generate similarity  
71 scores. If the similarity scores between a query protein and a template protein is the highest one of  
72 all similarity scores, and then the fold type of the template protein is considered as the fold type of  
73 the query protein.

74 All of the methods mentioned above are driving the development of this important field, they  
75 focus on employing discriminative frameworks to extract a robust and discriminative protein  
76 descriptor, which is used to measure the similarity by hand-crafted distance metrics, such as  
77 Euclidean distance and Cosine distance. But there are also suffering from the following  
78 shortcomings: Similarity measures of protein feature are not rigorous because different protein

79 feature usually subject to varying distributions, if we perform the same metrics on all the feature,  
80 the differences in feature distribution will be ignored. In addition, in the case of higher feature  
81 dimension, the distance between samples tends to be the same, so it is hard to measure the distance  
82 between different samples. To address these problems, based on the idea of metrics learning, we  
83 propose a new protein fold recognition by employing siamese network, we named it PFRSN. The  
84 objective of PFRSN is to learn a set of hierarchical nonlinear transformations to project protein  
85 pairs into the same fold feature subspace to ensure the distance between positive protein pairs is  
86 reduced and that of negative protein pairs is enlarged as much as possible. In addition, RFRSN is  
87 also dependent of the protein feature representation, robust and comprehensive feature  
88 representations contribute to the performance of RFRSN.

89         Recently, Zhu et al. [13] proposed a new protein descriptor called DeepFR to extract the  
90 fold-specific features by using deep convolutional neural network (DCNN) from protein  
91 residue-residue contact map and it improve the accuracy of protein fold recognition. However,  
92 DeepFR suffers from the following shortcomings: (1) what we found in our experiments shows that  
93 the potential relationship between protein residues is lost by pass the contact likelihood matrix  
94 extracted by CCMpred [14] through DCNN, because the contact likelihood matrix were filtered by  
95 activation function. (2) Multiple sequence alignment is required when using CCMpred to predict  
96 protein residue contact map, it is time-consuming and very inconvenient for performing protein fold  
97 recognition. In order to overcome these shortcomings, we use SSA tool [15] (A fast protein residue  
98 contact map prediction tool that requires only sequence as input) instead of CCMpred to predict the  
99 potential relationship between protein residues (Output of the previous layer of the SSA model),  
100 this potential relationship is native and not filtered by the activated function, which contains both  
101 protein residue-residue contact information and other protein structure information. On the other  
102 hand, we design a new network structure to make it effectively mine the structure information  
103 hidden in the potential relationship between protein residues. To distinguish it with DeepFR, we  
104 name it SSAfold.

105         In summary, the main contributions of our study are as follows:

106 (1) The idea of metrics learning was introduced into protein fold recognition to fill the gap in  
107 this point;

108 (2) Siamese networks are used to learn the complex nonlinear relationships stored in protein  
109 feature so that they can better measure the similarity between any two proteins in the protein fold  
110 subspace;

111 (3) The ability of DeepFR to extract protein feature was accelerated and improved by using the  
112 potential relation between protein residues alternative the protein contact map as the input of  
113 convolutional neural network and improving the structure of neural network.

114 The rest of this paper is organized as follows. We give a brief background on metrics and deep  
115 learning in section 2. The effectiveness analysis and the proposed SSAfold and RFRSN are  
116 presented in section 3. Experiment results are provided in section 4. Finally, we give a conclusion in  
117 section 5.

## 118 **MATERIALS AND METHODS**

### 119 **Benchmark datasets**

#### 120 **Training dataset**

121 In this paper, we train our SSAfold model and RFRSN by employing the SCOP2.06 dataset [16, 17].  
122 In addition, to ensure the independence of training data and test data, the training set should be  
123 cleaned to remove the proteins that have significant sequence similarity with proteins in test dataset.  
124 CD-HIT\_2D [18] is employed to guarantee all the proteins in the database share 40% sequence  
125 similarity with the proteins in test dataset. After removing the sequence redundancy in the training  
126 set, finally, we collected a training dataset consists of 23001 proteins covering 1198 folds, 1948  
127 superfamilies and 4646 families.

#### 128 **Test dataset**

129 we evaluated our method on LINDAHL dataset [19], it contains 976 proteins extracted from SCOP  
130 (version 1.37) with pairwise sequence identity less than 40%. In LINDAHL dataset, 321, 434 and  
131 555 proteins have at least one match at fold, superfamily and family levels, respectively.

#### 132 **Metrics learning**

133 The field of metric learning is witnessing great progress recently, which aims to measure the

134 similarity among samples pairs while using an optimal distance metric for learning tasks. Original  
135 metric learning approaches learns a linear Mahalanobis distance metric for similarity measurement  
136 [20-22]. For example, Weinberger et al. [23] proposed a large margin nearest neighbor method  
137 named LMNN by enforcing an anchor sample to share the same labels with its neighbors by a  
138 relative distance, which is one of the most popular metric learning methods before. Davis et al.[24]  
139 presented an metric learning (ITML) method based on information theoretic, which contributes  
140 multivariate Gaussian distribution and Mahalanobis distances into an information-theoretic setting.  
141 However, these methods only learn an ensemble of linear projections and cannot fully learn the  
142 nonlinear relationships hidden in the data, which are quite common in the real world applications.  
143 To address this problem, many methods based on kernel tricks [25-27] are usually employed for  
144 nonlinear transformations, yet they cannot determine the specific function and face scalability  
145 problem for other tasks. Recently, with the development of deep learning and several deep metric  
146 learning methods have been presented to address the limitation of kernel method by learning  
147 hierarchical nonlinear transformations [28, 29]. For example, Hu et al. [28] proposed a  
148 discriminative metric learning method (DDML) to learn the distance between faces.

149

## 150 **Deep learning**

151 In recent years, we have witnessed deep convolutional neural networks revolutionize computer  
152 vision [30, 31] and natural language processing [32, 33]. Tian et al. [31] proposed a new image  
153 denoising method by using deep convolutional neural networks with batch renormalization. Mun et  
154 al.[34] considered the temporal dependency of the events into the deep convolutional neural  
155 networks for dense video caption. In addition, deep learning has achieved impressive success in  
156 various tasks in the field of bioinformatic. For example, Li et al. [35] proposed ResPRE model,  
157 which is a high-accuracy protein contact prediction tool by coupling precision matrix with deep  
158 residual neural networks; Differently, our proposed RFRSN method employs a siamese network to  
159 learn the nonlinear distance metric and we use the back propagation algorithm to train the model.  
160 Hence, our proposed RFRSN is complementary to existing protein fold recognition.

## 161 **The proposed RFRSN model for fold recognition**

162 In this section, we propose a new method (RFRSN) for protein fold recognition, where the basic  
 163 idea of RFRSN is illustrated in **Fig. 1**. We use a siamese network to map a pair of proteins feature  
 164 into the same fold subspace, where the semantic distance of protein features can be directly  
 165 simulated by the Euclidean distance in this subspace. The choice of feature descriptors is unlimited,  
 166 the existing powerful protein feature descriptors can be used directly. For get better performance,  
 167 we also propose a robust and discriminate protein feature descriptor named SSAfold in this paper,  
 168 which can extract feature from potential protein residue relationship by using deep convolutional  
 169 neural network. Next, we present the proposed SSAfold method and RFRSN model, as well as its  
 170 implementation details.

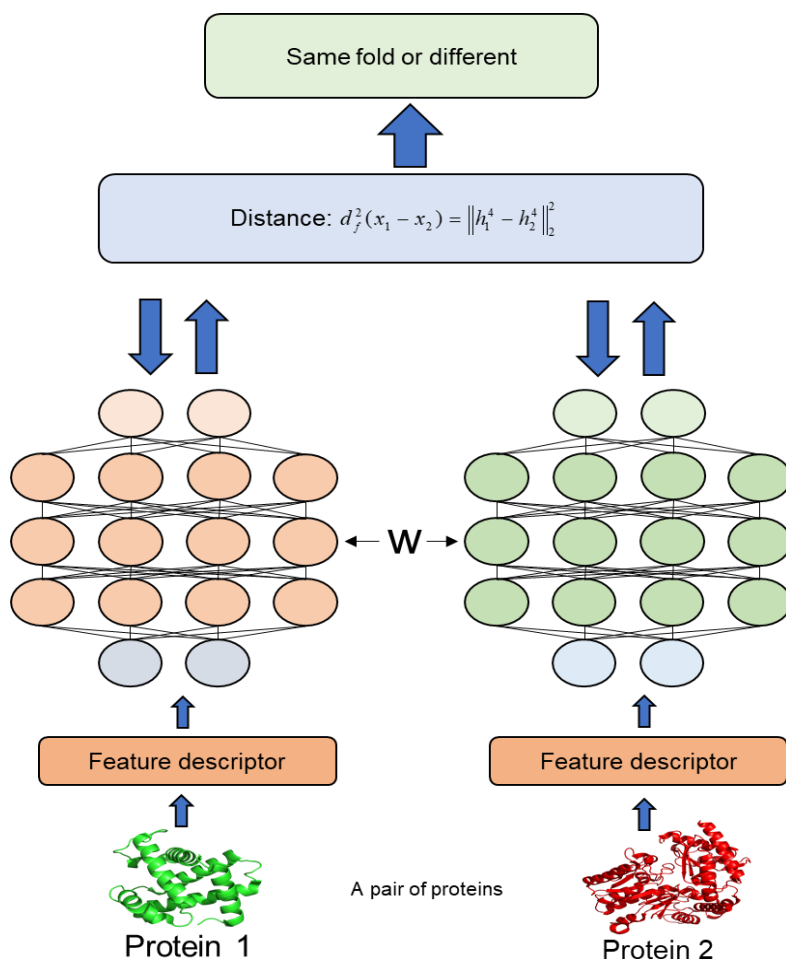

171  
 172 **Fig.1.** The flowchart of proposed RFRSN method for protein fold recognition. For a given pair of  
 173 feature vector of protein 1 and protein 2, they are mapped into the same fold subspace as  $H_1^4$  and  
 174  $H_2^4$  by using two neural networks (They share the same parameters). where the similarity score of

175  $H_1^4$  and  $H_2^4$  is calculated and employed to determine whether two proteins come from the same  
176 fold type.

### 177 **SSAfold: a fast and discriminate protein feature descriptor from predicting potential protein** 178 **residue-residue relationship**

179 There are many methods to predict protein residue-residue contacts, for example DeepCov [36],  
180 DNCON2 [37], DeepCON [38] and ResPRE [35]. These methods can produce very accurate  
181 residue-residue contacts, however, for these methods, homologs to the query protein must be  
182 collected by running HHblits [39] to search against sequence database UniProt dataset and then  
183 were organized as an MSA of the query protein. However, it takes a lot of time. Due to the  
184 limitation of our computer, we choose the SSA method as the potential protein residue-residue  
185 relationship extractor of SSAfold, SSA is very fast and accurate, which requires no information  
186 other than protein sequence (details about SSA can be seen in paper [15] ). Originally, SSA maps  
187 any protein sequence to a sequence of vector embeddings - one per amino acid position - that  
188 encode structural information and outputs residue-residue contacts. In this paper, the parameters of  
189 SSA provided by the author of SSA and we only employ the previous layer output of  
190 residue-residue contact as the potential protein residue-residue relationship.

### 191 **Extracting fold-specific features from potential protein residue-residue relationship**

192 The acquired residue-residue relationship is difficult to directly infer fold type of query protein, the  
193 main reasons are as follows: (1) although residue-residue relationship matrices contain a lot of  
194 structural information, it also contains a large amount noise and redundant information. (2) Due to  
195 the length of the protein sequence may not be the same, the similarity scores between two protein  
196 sequences are difficult to obtain. To sum up, how to use potential protein residue-residue  
197 relationship effectively for protein fold recognition is still a huge challenge.

198 Inspired by the tremendous success of convolutional neural networks in computer vision, we  
199 employ deep convolutional neural networks to extract fold-special feature from potential protein  
200 residue-residue relationship. Specifically, the DCNN takes predicted potential protein  
201 residue-residue relationship matrix of a query protein as input, and outputs fold type of the query  
202 protein. We train a DCNN over a collection of training samples, each sample consisting of potential



203 protein residue-residue relationship matrices of a protein together with its fold type as the label. The  
204 whole training process minimizes the cross entropy loss function through backpropagation [40].

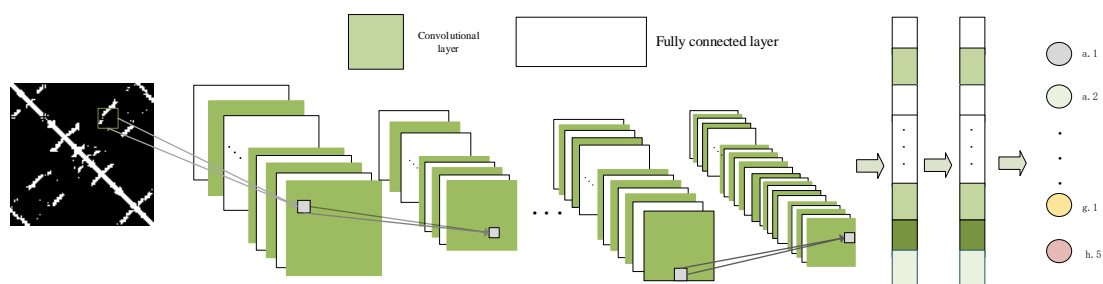

205

206 **Fig. 2.** Architecture of the deep convolutional neural network used to extract fold-specific  
207 features from potential protein residue-residue relationships.

208 Architecture of the deep convolutional neural network is shown in **Fig. 2**, which includes  
209 thirteen convolutional layers, three max-pooling layers, thirteen batchnorm layers and three fully  
210 connected layers. The parameters of SSAfold are given in **Supplementary in formation S1**.

211 For the full connected layers of SSAfold, the size of the input data must be the same, however  
212 different protein sequences usually have different sequence lengths  $L$ . According to the output of  
213 the SSA model, the size of potential protein residue-residue relationship matrix is  $L \times L$ . In order  
214 to solve this contradiction, we fix the size of the residue-residue relationship matrix is  $256 \times 256$   
215 by adopting sampling or padding operations accordingly, these two operations are widely used in  
216 the field of computer vision [41]. The specific sampling and padding strategies are described as  
217 follow:

- 218 ● Sampling: For the length of protein over 256, we randomly sampled a  $256 \times 256$  sub-matrix  
219 from its potential protein residue-residue relationship matrix. We repeated this operation ten  
220 times and obtained an ensemble.
- 221 ● Padding: For the length of protein shorter than 256, we embedded its relationship matrix into a  
222  $256 \times 256$  matrix with all elements being 0. The embedding positions are random; thus, we  
223 obtained an ensemble of  $256 \times 256$  matrices after repeating this procedure ten times.

224 **Extracting fold feature by SSAfold:** to our best knowledge, the fully connected layers play the  
225 role of "classifier" in the whole convolutional neural network. If operations such as convolution  
226 layer, pooling layer and activation function layer map the original data to the hidden feature space,  
227 the full connected layer maps the learned "distributed feature representation" to the sample space. In

228 this paper, we use the output of the first fully connected layer were used as the input of metric  
229 Learning Network, we named it SSAfold features. SSAfold feature has the comprehensive  
230 information and they are higher-level features made up of lower-level features. Experiments show  
231 that this strategy can get the best results.

### 232 **Proposed RFRSN for protein fold recognition**

233 We use the SSAfold features mentioned in the previous section as the protein feature descriptor.  
234 Then, we learn a fair metrics by siamese network. The basic idea of RFRSN is shown in **Fig. 3**.

235

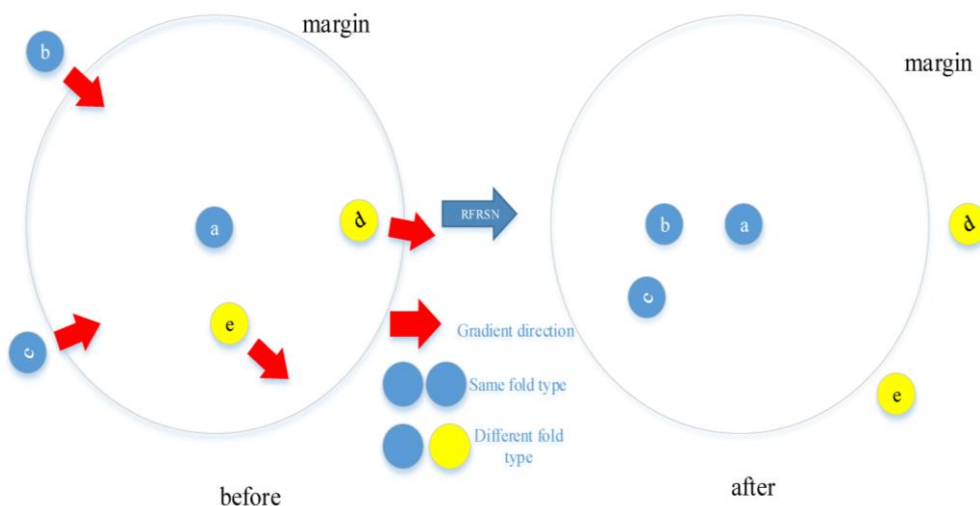

236

237 **Fig. 3.** Intuitive illustration of the proposed RFRSN method. There are five protein sequence, which  
238 a,b and c belong to the same protein fold type, and d and e belong to the same protein fold type,  
239 here, assume protein a as anchor protein. In the original protein feature space, the distance between  
240 the positive pair is larger than that between the negative pair which may be caused by the individual  
241 differences of different protein. This phenomenon is not conducive to protein fold recognition. Then,  
242 we use our proposed RFRSN to create a gradient that pulls positive protein closer to the anchor  
243 protein and push the negative protein away from the anchor protein. Finally, the distance of each  
244 positive protein pair is less than the margin and that of each negative protein pair is higher than the  
245 margin.

246 First, we construct a pair of deep neural network (the pair of neural networks shares the same

247 parameters) to compute the feature representation of a protein pair by passing them through  
 248 multiple layers of nonlinear transformations. Now, assume the number layers of deep neural  
 249 network is set to  $M+1$ , and each layer has  $p^m$  hidden points, where  $m=1, 2, \dots, M$ . For a given  
 250 protein  $x \in R^d$ ,  $d$  is the dimension of original protein feature. The output of first layer is  
 251  $h^1 = s(w^1 + b^1)$ , where  $w^1$  and  $b^1$  is the parameters of the first layer to be learned in training process  
 252 and  $s$  is the nonlinear activation function, such as relu and sigmoid. Then, the first output is used to  
 253 be as the input of next layer, we repeat this operation and get the output of the  $m$ -th layer:  
 254  $h^m = s(w^m h^{m-1} + b^m)$ , where  $w^m$  and  $b^m$  is the parameters of the  $m$ -th layer. Finally, the output of the  
 255 top level can be computed as:

$$256 \quad f(x) = h^M = s(w^M h^{M-1} + b^M) \quad (1)$$

257 Where the mapping project  $f: R^d \rightarrow R^{p^m}$  is determined by the parameters of the project  
 258 matrix  $w^m$  and bias  $b^m$ , where  $m=1, 2, \dots, M$ .

259 Now, given a pair of protein sample  $x^i$  and  $x^j$ , pass them into the siamese network respectively.  
 260 Finally, they can be represented as  $f(x^i) = h_i^M$  and  $f(x^j) = h_j^M$ . The distance of protein pair can be  
 261 measured by computing the squared Euclidean distance between the most top level representations,  
 262 which can be defined as follows:

$$263 \quad d_f^2 = \|f(x_i) - f(x_j)\|_2^2 \quad (2)$$

264 To achieve better performance, we expect the distances between positive pairs are smaller than  
 265 those between negative pairs to get more powerful protein feature representation, which is more  
 266 effective to protein fold recognition. To learn the appropriate parameter  $w^M$  and  $b^M$ ,  $w^M$  and  $b^M$   
 267 are the ensemble parameters of whole siamese network, we formulate our RFRSN as the following  
 268 optimization problem:

$$269 \quad L(Y, (Y, (x_1, x_2))) = \frac{1}{2N} \sum_{n=1}^N (Y D_W^2 + (1-Y) \max(m - D_W^2, 0))^2 \quad (3)$$

270 Where  $D_W^2$  is the Euclidean distance of the protein  $x^1$  and  $x^2$  can be computed as:

$$271 \quad D_W^2 = \|f(x_1) - f(x_2)\|_2^2 = (\sum_{i=1}^p (f(X_1)^i - f(X_2)^i)^2)^{1/2} \quad (4)$$

272 Where  $p$  is the dimension of the final output by deep neural network.  $Y$  is the label whether the  
273 two samples come from the same fold type, when two samples share the same fold label,  $Y$  is set to  
274 1, and otherwise it will be set to 0. From Equation (3), when  $Y=1$ , we just need to get as close as  
275 possible between the two samples, when  $Y=0$ , we need to make the distance between the sample  
276 pairs greater than the threshold value margin. Then value of margin has to be assumed before  
277 training process. We employ the SGD method to train the entire network.

278 Assigning fold type to query protein: Due to the high discrimination, the final output feature  
279 representation can be used to assess the distance between proteins and can be used to rank template  
280 proteins for a target protein. The fold type of the template protein that matches the query protein the  
281 most will be assigned to the query protein.

## 282 **Results**

### 283 **Evaluation strategy and comparison**

284 In our experiment, we use top1 and top5 as the measure of our method, Top1 Accuracy refers to the  
285 accuracy with which the top-ranked category matches actual labels, Top-5 Accuracy refers to the  
286 accuracy with which the top5 categories include actual labels. We use each protein in test set as  
287 query protein, compare it with template protein, and final rank them based on the distance.

288 For SSAfold, we freeze the parameter of network of SSAfold and use it as a feature descriptor,  
289 the output of final fully connected layer as protein feature. Then we employ cosine distance to  
290 measure similarity scores between query protein and template protein like DeepFR method. Finally,  
291 the fold type of the template protein that matches the query protein the most will be assigned to the  
292 query protein.

293 For RFRSN method, we also freeze the parameter of network of SSAfold and use it as a  
294 feature descriptor, the output of first fully connected layer as protein feature. Then we randomly  
295 selected 500,000 pairs of protein samples for training dataset, of which 250,000 were positive  
296 samples and 250,000 were negative samples. These pairs of protein samples are used to train the  
297 siamese network. Finally, we pass the query protein feature and the template protein feature into the  
298 siamese network to computer the distance between two proteins. The fold type of the template  
299 protein closest to the query protein is assigned to the query protein.

300 The performance of our method was compared with other widely used 25 state-of-the-art  
 301 approaches on the LINDAHL dataset, including alignment methods (PSI-Blast [7], HMMER [42],  
 302 SAM-T98 [42], BLASTLINK [19]), SSEARCH [9], SSHMM [43], THREADER [44], Fugue [45],  
 303 RAPTOR [12], SPARKS [46], SPARKS-X [47], SP3 [48], SP4 [49], SP5 [50], HHpred [51],  
 304 BoostThreader [11], FFAS-3D [52], HH-fold [53]), machine learning methods (FOLDpro [54],  
 305 RF-Fold ), deep learning methods (DN-Fold, DeepFR) and ensemble methods (RFDN-Fold,  
 306 DN-FoldS, DN-FoldR, TA-fold[53]).

307 **Table 1.** Performance comparison of different protein fold recognition methods on the test dataset.

| Method         | Family      |           | Superfamily |           | Fold      |           |
|----------------|-------------|-----------|-------------|-----------|-----------|-----------|
|                | Top 1 (%)   | Top 5 (%) | Top 1 (%)   | Top 5 (%) | Top 1 (%) | Top 5 (%) |
| PSI-Blast      | 71.2        | 72.3      | 27.4        | 27.9      | 4.0       | 4.7       |
| HMMER [42]     | 67.7        | 73.5      | 20.7        | 31.3      | 4.4       | 14.6      |
| SAM-T98        | 70.1        | 75.4      | 28.3        | 38.9      | 3.4       | 18.7      |
| BLASTLINK      | 74.6        | 78.9      | 29.3        | 40.6      | 6.9       | 16.5      |
| SSEARCH        | 68.6        | 75.5      | 20.7        | 32.5      | 5.6       | 15.6      |
| SSHMM          | 63.1        | 71.7      | 18.4        | 31.6      | 6.9       | 24.0      |
| THREADER       | 49.2        | 58.9      | 10.8        | 24.7      | 14.6      | 37.7      |
| Fugue          | 82.2        | 85.8      | 41.9        | 53.2      | 12.5      | 26.8      |
| SPARKS [46]    | 81.6        | 88.1      | 52.5        | 69.1      | 28.7      | 47.7      |
| SP3 [48]       | 81.6        | 86.8      | 55.3        | 67.7      | 30.8      | 47.4      |
| HHpred [51]    | 82.9        | 87.1      | 58.0        | 70.0      | 25.2      | 39.4      |
| SP4            | 80.9        | 86.3      | 57.8        | 57.8      | 30.8      | 53.6      |
| SP5            | 82.4        | 87.6      | 59.8        | 70.0      | 37.9      | 58.7      |
| RAPTOR         | <b>86.6</b> | 89.3      | 56.3        | 69.0      | 38.2      | 58.7      |
| SPARKS-X       | 84.1        | 90.3      | 59.0        | 76.3      | 45.2      | 67.0      |
| BoostThreader  | 86.5        | 90.5      | 66.1        | 76.4      | 42.6      | 57.4      |
| FOLDpro        | 85.0        | 89.9      | 55.0        | 70.0      | 26.5      | 48.3      |
| RF-Fold        | 84.5        | 91.5      | 63.4        | 79.3      | 40.8      | 58.3      |
| DN-Fold        | 84.5        | 91.2      | 61.5        | 76.5      | 33.6      | 60.7      |
| DN-FoldS       | 84.1        | 91.2      | 62.7        | 76.7      | 33.3      | 57.9      |
| DN-FoldR       | 82.3        | 88.3      | 56.0        | 71.0      | 27.4      | 56.7      |
| DeepFR (S1)    | 67.4        | 80.9      | 47.0        | 63.4      | 44.5      | 62.9      |
| DeepFR (S2)    | 65.4        | 83.4      | 51.4        | 67.1      | 56.1      | 70.1      |
| DeepFRpro (S1) | 85.6        | 91.9      | 66.6        | 82.0      | 57.6      | 73.8      |
| SSAFold        | 65.8        | 84.9      | 58.3        | 73.0      | 59.8      | 73.2      |
| RFRSN          | 66.3        | 76.1      | 62.4        | 78.6      | 62.0      | 82.6      |

308 As in table 1, our proposed SSAFold significantly outperformed all the other methods at the  
309 fold level except RFRSN method. Specifically, the accuracy of SSAfold for top 1 and top 5  
310 predictions are 65.8% ,84.9%, 58.3%, 73.0%, 59.8% and 73.2% at family level, superfamily level  
311 and fold level, respectively. Especially compared with DeepFR, the accuracy of SSAFold for top 1  
312 and top 5 at family level is about 7% and 6% higher than DeepFR, the fold-feature of DeepFR is the  
313 best features for protein fold recognition before, respectively. In addition, since the whole SSAfold  
314 model is connected by two neural network models, the entire protein fold recognition model deals  
315 directly with the protein sequence, proteins fold type can be identified by SSAfold faster than other  
316 methods. For RFRSN method, we learn a new metric distance by siamese network and we employ  
317 the new metric distance to measure the query protein and template protein. From the table 1, we can  
318 see that the new measure of distance can more effectively measure the relationship between two  
319 proteins, and the accuracy of SSAfold for top 1 and top 5 predictions are 66.3%, 76.1%, 62.4%,  
320 78.6%, 62.0%, 82.6% at family level, superfamily level and fold level, respectively. In particular,  
321 for some ensemble methods, such as RFDN-Fold, DN-FoldS and DN-FoldR, our proposed SSAfold  
322 and RFRSN method still can outperform them, this is attributed to the powerful and automatic  
323 feature extraction capability of the convolutional neural network. In addition, potential protein  
324 residue-residue relationships contain a lot of structural information also contribute this  
325 improvement. For RFRSN method, it learns a right distance metric to make the distance between  
326 positive protein pairs is reduced and that of negative pairs be enlarged as much as possible. The  
327 ideal of RFRSN is simple and independent, it can be easily used to process other powerful protein  
328 feature descriptor for different tasks.

### 329 Discussion about margin

330 For parameter  $m$ , different parameters have a great influence on the results, and the main factor  
331 determining  $m$  is the distribution of protein feature representation.

332 **Table 1.** Performance comparison of different protein fold recognition methods on the test dataset.

| m   | Family    |           | Superfamily |           | Fold      |           |
|-----|-----------|-----------|-------------|-----------|-----------|-----------|
|     | Top 1 (%) | Top 5 (%) | Top 1 (%)   | Top 5 (%) | Top 1 (%) | Top 5 (%) |
| 0.2 | 60.4      | 71.2      | 51.2        | 62.2      | 52.6      | 66.0      |
| 0.7 | 67.7      | 86.8      | 60.6        | 75.8      | 62.0      | 75.6      |
| 1.2 | 65.9      | 80.0      | 58.3        | 78.6      | 59.8      | 73.2      |

|     |      |      |      |      |      |      |
|-----|------|------|------|------|------|------|
| 1.7 | 61.0 | 76.8 | 57.2 | 72.6 | 54.2 | 68.0 |
| 2.2 | 58.0 | 72.0 | 51.8 | 68.9 | 50.8 | 62.0 |

333 From table 3, we can see that the setting of margin determines the classification effect. When  
334  $m$  is set to 0.7, we can see that our RFRSN get the best performance, respectively. the accuracy of  
335 RFRSN for top 1 and top 5 predictions are 66.3%, 76.1%, 62.4%, 78.6%, 62.0% and 82.6% at  
336 family level, superfamily level and fold level, respectively. However, when the setting of margin  
337 does not correspond to the protein feature distribution, a poor effect may be obtained. For example,  
338 when  $m$  is set to 0.2, the performance of RFRSN is not as good as our SSAfold. On the other hand,  
339 it is not surprising, when  $m$  is too small, the boundary between positive and negative samples  
340 becomes blurred and when  $m$  is too big, it is very difficult to learn the parameters of the siamese  
341 network.

## 342 Feature analysis

343 For downstream tasks, deep convolutional neural network is a black box and we don't know why  
344 the neural convolutional neural network works even though it does very well on a lot of tasks. In  
345 this study, we take protein fold recognition as an example, through the pictorial display of features  
346 learned from each convolutional layer, we briefly analyse how these features affect fold recognition  
347 as the network depth increases.

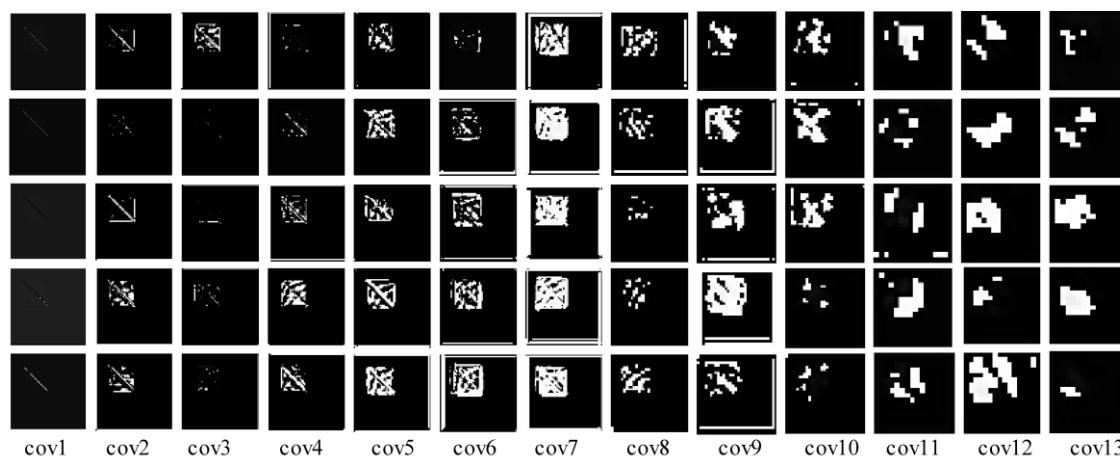

349 From the Fig. 4, in the early stages of training, the shallow convolutional kernel focuses on the  
350 entire input information (here, it also contains the supplementary 0 element). Now, the features  
351 extracted by the shallow convolutional kernel is low-level and contains entire residue points. As the  
352 network gets deeper and deeper, the convolutional kernels turn attention into local protein residue  
353 that may affect the type of protein fold type, protein residues that have no effect on the

354 classification results and the complement of 0 are ignored at this stage. In the later stages of training,  
355 at this time, the features extracted by convolutional kernel are more abstract and almost difficult to  
356 explain. According to our knowledge, these features may be the relationship between two residues  
357 in the whole protein chain, the interactions between them affect the protein fold type.  
358



359 **Conclusion**

360 Accurate and fast classification of protein fold is essential for predicting protein tertiary structure.  
361 In this paper, we have proposed two complementary methods. SSAfold for extracting robust and  
362 discriminative features, it can describe the protein automatically and comprehensively. RFRSN for  
363 projecting the feature representation into a fold subspace, where the distance between proteins  
364 shared same fold type is closer to the distance between proteins shared different fold type. The  
365 protein feature representation processed by RFRSN is very applicable for template-based fold  
366 assignment. In addition, the proposed method only using the protein residue- residue relationship  
367 and there is no integration of other protein information and other classification algorithms. Even so,  
368 our proposed SSAfold and RFRSN has achieved competitive results.

369

370

371 **REFERENCES**

- 372 1. Chung I-F, Huang C-D, Shen Y-H et al. Recognition of structure classification of protein folding by NN  
373 and SVM hierarchical learning architecture. *Artificial Neural Networks and Neural Information*  
374 *Processing—ICANN/ICONIP 2003*. Springer, 2003, 1159-1167.
- 375 2. Shen H-B, Chou K-C. Ensemble classifier for protein fold pattern recognition, *Bioinformatics*  
376 2006;22:1717-1722.
- 377 3. Liu B, Chen J, Guo M et al. Protein remote homology detection and fold recognition based on  
378 Sequence-Order Frequency Matrix, *IEEE/ACM Transactions on Computational Biology and Bioinformatics*  
379 2017;16:292-300.
- 380 4. Jo T, Cheng J. Improving protein fold recognition by random forest. In: *BMC Bioinformatics*. 2014, p.  
381 S14. Springer.
- 382 5. Jo T, Hou J, Eickholt J et al. Improving protein fold recognition by deep learning networks, *Scientific*  
383 *reports* 2015;5:17573.
- 384 6. Liaw A, Wiener M. Classification and regression by randomForest, *R news* 2002;2:18-22.
- 385 7. Altschul SF, Gish W, Miller W et al. Basic local alignment search tool, *Journal of molecular biology*  
386 1990;215:403-410.
- 387 8. Eddy SR. Profile hidden Markov models, *Bioinformatics (Oxford, England)* 1998;14:755-763.
- 388 9. Pearson WR, Lipman DJ. Improved tools for biological sequence comparison, *Proceedings of the*  
389 *National Academy of Sciences* 1988;85:2444-2448.
- 390 10. Söding J. Protein homology detection by HMM–HMM comparison, *Bioinformatics* 2005;21:951-960.
- 391 11. Peng J, Xu J. Boosting protein threading accuracy. In: *Annual International Conference on Research in*  
392 *Computational Molecular Biology*. 2009, p. 31-45. Springer.
- 393 12. Xu J, Li M, Kim D et al. RAPTOR: optimal protein threading by linear programming, *Journal of*  
394 *bioinformatics and computational biology* 2003;1:95-117.
- 395 13. Zhu J, Zhang H, Li SC et al. Improving protein fold recognition by extracting fold-specific features  
396 from predicted residue–residue contacts, *Bioinformatics* 2017;33:3749-3757.
- 397 14. Seemayer S, Gruber M, Söding J. CCMpred—fast and precise prediction of protein residue–residue  
398 contacts from correlated mutations, *Bioinformatics* 2014;30:3128-3130.
- 399 15. Bepler T, Berger B. Learning protein sequence embeddings using information from structure, *arXiv*  
400 *preprint arXiv:1902.08661* 2019.
- 401 16. Chandonia J-M, Fox NK, Brenner SE. SCOPe: manual curation and artifact removal in the structural  
402 classification of proteins—extended database, *Journal of molecular biology* 2017;429:348-355.
- 403 17. Fox NK, Brenner SE, Chandonia J-M. SCOPe: Structural Classification of Proteins—extended,  
404 integrating SCOP and ASTRAL data and classification of new structures, *Nucleic acids research*  
405 2014;42:D304-D309.
- 406 18. Li W, Godzik A. Cd-hit: a fast program for clustering and comparing large sets of protein or nucleotide  
407 sequences, *Bioinformatics* 2006;22:1658-1659.
- 408 19. Lindahl E, Elofsson A. Identification of related proteins on family, superfamily and fold level, *Journal of*  
409 *molecular biology* 2000;295:613-625.
- 410 20. Globerson A, Roweis ST. Metric learning by collapsing classes. In: *Advances in neural information*  
411 *processing systems*. 2006, p. 451-458.
- 412 21. Schultz M, Joachims T. Learning a distance metric from relative comparisons. In: *Advances in neural*

- 413 information processing systems. 2004, p. 41-48.
- 414 22. Shalev-Shwartz S, Singer Y, Ng AY. Online and batch learning of pseudo-metrics. In: Proceedings of the  
415 twenty-first international conference on Machine learning. 2004, p. 94.
- 416 23. Weinberger KQ, Saul LK. Distance metric learning for large margin nearest neighbor classification,  
417 Journal of Machine Learning Research 2009;10.
- 418 24. Davis JV, Kulis B, Jain P et al. Information-theoretic metric learning. In: Proceedings of the 24th  
419 international conference on Machine learning. 2007, p. 209-216.
- 420 25. Tsang IW, Kwok JT, Bay C et al. Distance metric learning with kernels. In: Proceedings of the  
421 International Conference on Artificial Neural Networks. 2003, p. 126-129. Citeseer.
- 422 26. Xiong F, Gou M, Camps O et al. Person re-identification using kernel-based metric learning methods. In:  
423 European conference on computer vision. 2014, p. 1-16. Springer.
- 424 27. Yeung D-Y, Chang H. A kernel approach for semisupervised metric learning, IEEE Transactions on  
425 Neural Networks 2007;18:141-149.
- 426 28. Hu J, Lu J, Tan Y-P. Discriminative deep metric learning for face verification in the wild. In:  
427 Proceedings of the IEEE conference on computer vision and pattern recognition. 2014, p. 1875-1882.
- 428 29. Hu J, Lu J, Tan Y-P. Deep transfer metric learning. In: Proceedings of the IEEE conference on computer  
429 vision and pattern recognition. 2015, p. 325-333.
- 430 30. Sun X, Xu H, Dong J et al. Few-shot Learning for Domain-specific Fine-grained Image Classification,  
431 IEEE Transactions on Industrial Electronics 2020.
- 432 31. Tian C, Xu Y, Zuo W. Image denoising using deep CNN with batch renormalization, Neural Networks  
433 2020;121:461-473.
- 434 32. Kowsari K, Jafari Meimandi K, Heidarysafa M et al. Text classification algorithms: A survey,  
435 Information 2019;10:150.
- 436 33. Yao L, Mao C, Luo Y. Graph convolutional networks for text classification. In: Proceedings of the Aaai  
437 Conference on Artificial Intelligence. 2019, p. 7370-7377.
- 438 34. Mun J, Yang L, Ren Z et al. Streamlined dense video captioning. In: Proceedings of the IEEE  
439 Conference on Computer Vision and Pattern Recognition. 2019, p. 6588-6597.
- 440 35. Li Y, Hu J, Zhang C et al. ResPRE: high-accuracy protein contact prediction by coupling precision  
441 matrix with deep residual neural networks, Bioinformatics 2019;35:4647-4655.
- 442 36. Jones DT, Kandathil SM. High precision in protein contact prediction using fully convolutional neural  
443 networks and minimal sequence features, Bioinformatics 2018;34:3308-3315.
- 444 37. Derevyanko G, Grudinin S, Bengio Y et al. Deep convolutional networks for quality assessment of  
445 protein folds, Bioinformatics 2018;34:4046-4053.
- 446 38. Adhikari B. DEEPCON: protein contact prediction using dilated convolutional neural networks with  
447 dropout, Bioinformatics 2020;36:470-477.
- 448 39. Remmert M, Biegert A, Hauser A et al. HHblits: lightning-fast iterative protein sequence searching by  
449 HMM-HMM alignment, Nature methods 2012;9:173-175.
- 450 40. LeCun Y, Boser BE, Denker JS et al. Handwritten digit recognition with a back-propagation network. In:  
451 Advances in neural information processing systems. 1990, p. 396-404.
- 452 41. Chopra S, Hadsell R, LeCun Y. Learning a similarity metric discriminatively, with application to face  
453 verification. In: 2005 IEEE Computer Society Conference on Computer Vision and Pattern Recognition  
454 (CVPR'05). 2005, p. 539-546. IEEE.
- 455 42. Karplus K, Barrett C, Hughey R. Hidden Markov models for detecting remote protein homologies,

- 456 Bioinformatics (Oxford, England) 1998;14:846-856.
- 457 43. Hargbo J, Elofsson A. Hidden Markov models that use predicted secondary structures for fold  
458 recognition, *Proteins: Structure, Function, and Bioinformatics* 1999;36:68-76.
- 459 44. Jones DT, Taylor W, Thornton JM. A new approach to protein fold recognition, *Nature* 1992;358:86-89.
- 460 45. Shi J, Blundell TL, Mizuguchi K. FUGUE: sequence-structure homology recognition using  
461 environment-specific substitution tables and structure-dependent gap penalties, *Journal of molecular biology*  
462 2001;310:243-257.
- 463 46. Zhou H, Zhou Y. Single-body residue-level knowledge-based energy score combined with sequence-  
464 profile and secondary structure information for fold recognition, *Proteins: Structure, Function, and*  
465 *Bioinformatics* 2004;55:1005-1013.
- 466 47. Yang JY, Chen X. Improving taxonomy-based protein fold recognition by using global and local  
467 features, *Proteins: Structure, Function, and Bioinformatics* 2011;79:2053-2064.
- 468 48. Zhou H, Zhou Y. Fold recognition by combining sequence profiles derived from evolution and from  
469 depth-dependent structural alignment of fragments, *Proteins: Structure, Function, and Bioinformatics*  
470 2005;58:321-328.
- 471 49. Liu S, Zhang C, Liang S et al. Fold recognition by concurrent use of solvent accessibility and residue  
472 depth, *Proteins: Structure, Function, and Bioinformatics* 2007;68:636-645.
- 473 50. Zhang W, Liu S, Zhou Y. Sp 5: improving protein fold recognition by using torsion angle profiles and  
474 profile-based gap penalty model, *PloS one* 2008;3:e2325.
- 475 51. Söding J, Biegert A, Lupas AN. The HHpred interactive server for protein homology detection and  
476 structure prediction, *Nucleic acids research* 2005;33:W244-W248.
- 477 52. Xu D, Jaroszewski L, Li Z et al. FFAS-3D: improving fold recognition by including optimized structural  
478 features and template re-ranking, *Bioinformatics* 2014;30:660-667.
- 479 53. Xia J, Peng Z, Qi D et al. An ensemble approach to protein fold classification by integration of  
480 template-based assignment and support vector machine classifier, *Bioinformatics* 2017;33:863-870.
- 481 54. Cheng J, Baldi P. A machine learning information retrieval approach to protein fold recognition,  
482 *Bioinformatics* 2006;22:1456-1463.
- 483
